# Supplementary material for: Role of bZIP Transcription Factors in Response to NaCl Stress in Tamarix ramosissima under Exogenous Potassium (K+)
Source: MDPI journal article supplement (doi:10.3390/genes14122203), 2023-12-13
Supplement: s1 [file s1]

Supplementary Table S1. Sequences of specific primers

| ID             | Primer name           | Primer sequence (5'-3')                             |
|----------------|-----------------------|-----------------------------------------------------|
| <i>bZIP_16</i> | <i>Unigene0082573</i> | F: CGGGGTTGTCATGGAGCATA<br>R: CAGCACCTTGATTGGGTTC   |
| <i>bZIP_6</i>  | <i>Unigene0040953</i> | F: TGGCAAAGACAGAGGTCGAA<br>R: AAGGTGCAGGTGATAAGCCC  |
| <i>bZIP_7</i>  | <i>Unigene0053087</i> | F: ACAAGCATGAATGTCACGGC<br>R: CGCAAAAGTTCTCCTCGTCC  |
| <i>bZIP_17</i> | <i>Unigene0083695</i> | F: GCTTCCGCACTTGGGATTG<br>R: TCTTGACCGTCGAGCTGATTC  |
| <i>bZIP_14</i> | <i>Unigene0076255</i> | F: ATGGCCCCCAGAATGGTTTC<br>R: TGCATAGCAGGTATCGCAGG  |
| <i>bZIP_18</i> | <i>Unigene0083709</i> | F: AGTCAGCATCAGGAACCACG<br>R: TTCCTGAACAACCCCTGCTC  |
| <i>bZIP_5</i>  | <i>Unigene0033624</i> | F: TCATGCCGGTTCGGATTTGA<br>R: AGAGCTCGAGTTCGGAGAGT  |
| <i>bZIP_15</i> | <i>Unigene0081648</i> | F: AATGCACAGGCGGTTCGATAA<br>R: AGGCTTACCGGACTCAGGAT |
| <i>bZIP_9</i>  | <i>Unigene0055455</i> | F: GCGCCAAATCGTCCGTTATC<br>R: CTATGACCCGAATCGGCCTG  |
|                | <i>Tubulin</i>        | F: GCTGAGATTACAACCGCTG<br>R: CTGTTCGTTTGGTCTTGATT   |

Note: F means Forward primer, R means Reversed primer.

Supplementary Table S2. Data filtering statistics table

| Sample              | RawDatas | CleanData(%)      | Adapter(%)     | LowQuality(%)  | polyA(%)  | N(%)         |
|---------------------|----------|-------------------|----------------|----------------|-----------|--------------|
| Control group-0 h-1 | 43090746 | 42525274 (98.69%) | 252204 (0.59%) | 308850 (0.72%) | 0 (0.00%) | 4418 (0.01%) |
| Control group-0 h-2 | 43083210 | 42264990 (98.10%) | 429632 (1.00%) | 383916 (0.89%) | 0 (0.00%) | 4672 (0.01%) |
| Control group-0 h-3 | 41837770 | 41301300 (98.72%) | 233664 (0.56%) | 298868 (0.71%) | 0 (0.00%) | 3938 (0.01%) |
| N-48 h-1            | 37641876 | 37103264 (98.57%) | 152462 (0.41%) | 386150 (1.03%) | 0 (0.00%) | 0 (0.00%)    |
| N-48 h-3            | 43708134 | 43242360 (98.93%) | 133820 (0.31%) | 331950 (0.76%) | 0 (0.00%) | 4 (0.00%)    |
| N-48 h-3            | 44840066 | 44378790 (98.97%) | 156148 (0.35%) | 305128 (0.68%) | 0 (0.00%) | 0 (0.00%)    |
| N-168 h-1           | 43816684 | 43212896 (98.62%) | 157908 (0.36%) | 445870 (1.02%) | 0 (0.00%) | 10 (0.00%)   |
| N-168 h-2           | 44021530 | 43498298 (98.81%) | 107958 (0.25%) | 415272 (0.94%) | 0 (0.00%) | 2 (0.00%)    |
| N-168 h-3           | 44483216 | 43938688 (98.78%) | 129992 (0.29%) | 414536 (0.93%) | 0 (0.00%) | 0 (0.00%)    |
| N + K-48 h-1        | 42157406 | 41555604 (98.57%) | 281692 (0.67%) | 316144 (0.75%) | 0 (0.00%) | 3966 (0.01%) |
| N + K-48 h-2        | 42321718 | 41683754 (98.49%) | 284526 (0.67%) | 349468 (0.83%) | 0 (0.00%) | 3970 (0.01%) |
| N + K-48 h-3        | 42750232 | 42055378 (98.37%) | 359420 (0.84%) | 331168 (0.77%) | 0 (0.00%) | 4266 (0.01%) |
| N + K-168 h-1       | 42104080 | 41530626 (98.64%) | 252242 (0.60%) | 317294 (0.75%) | 0 (0.00%) | 3918 (0.01%) |
| N + K-168 h-2       | 42091546 | 41435868 (98.44%) | 276730 (0.66%) | 375140 (0.89%) | 0 (0.00%) | 3808 (0.01%) |
| N + K-168 h-3       | 43098086 | 42449748 (98.50%) | 320946 (0.74%) | 323192 (0.75%) | 0 (0.00%) | 4200 (0.01%) |

Note: N-48 h: 200 mM NaCl-48 h, N + K-48 h: 200 mM NaCl + 10 mM KCl-48 h, N-168 h: 200 mM NaCl-168 h, N + K-168 h: 200 mM NaCl + 10 mM KCl-168 h.

Supplementary Table S3. Pfam prediction of protein domain structures in *bZIP* candidate genes

| ID             | Gene                  | envelope<br>start | envelope<br>end | hmm acc    | hmm<br>length | bit<br>score | clan   | PfamA_definition          |
|----------------|-----------------------|-------------------|-----------------|------------|---------------|--------------|--------|---------------------------|
| <i>bZIP_1</i>  | <i>Unigene0007907</i> | 18                | 80              | PF00170.21 | 64            | 47.1         | CL0018 | bZIP transcription factor |
| <i>bZIP_2</i>  | <i>Unigene0009374</i> | 81                | 128             | PF00170.21 | 64            | 31.2         | CL0018 | bZIP transcription factor |
| <i>bZIP_3</i>  | <i>Unigene0009723</i> | 19                | 80              | PF00170.21 | 64            | 44           | CL0018 | bZIP transcription factor |
| <i>bZIP_4</i>  | <i>Unigene0014256</i> | 17                | 70              | PF00170.21 | 64            | 37.4         | CL0018 | bZIP transcription factor |
| <i>bZIP_5</i>  | <i>Unigene0033624</i> | 124               | 179             | PF00170.21 | 64            | 38.6         | CL0018 | bZIP transcription factor |
| <i>bZIP_6</i>  | <i>Unigene0040953</i> | 189               | 239             | PF00170.21 | 64            | 47.8         | CL0018 | bZIP transcription factor |
| <i>bZIP_7</i>  | <i>Unigene0053087</i> | 32                | 93              | PF00170.21 | 64            | 43.3         | CL0018 | bZIP transcription factor |
| <i>bZIP_8</i>  | <i>Unigene0053089</i> | 34                | 95              | PF00170.21 | 64            | 39.4         | CL0018 | bZIP transcription factor |
| <i>bZIP_9</i>  | <i>Unigene0055455</i> | 263               | 326             | PF00170.21 | 64            | 43.6         | CL0018 | bZIP transcription factor |
| <i>bZIP_10</i> | <i>Unigene0061455</i> | 434               | 495             | PF00170.21 | 64            | 34.5         | CL0018 | bZIP transcription factor |
| <i>bZIP_11</i> | <i>Unigene0066132</i> | 80                | 141             | PF00170.21 | 64            | 49.7         | CL0018 | bZIP transcription factor |
| <i>bZIP_12</i> | <i>Unigene0068775</i> | 175               | 238             | PF00170.21 | 64            | 36.5         | CL0018 | bZIP transcription factor |
| <i>bZIP_13</i> | <i>Unigene0071652</i> | 40                | 75              | PF00170.21 | 64            | 39.2         | CL0018 | bZIP transcription factor |
| <i>bZIP_14</i> | <i>Unigene0076255</i> | 209               | 272             | PF00170.21 | 64            | 72.6         | CL0018 | bZIP transcription factor |
| <i>bZIP_15</i> | <i>Unigene0081648</i> | 428               | 490             | PF00170.21 | 64            | 38           | CL0018 | bZIP transcription factor |
| <i>bZIP_16</i> | <i>Unigene0082573</i> | 400               | 447             | PF00170.21 | 64            | 47.3         | CL0018 | bZIP transcription factor |
| <i>bZIP_17</i> | <i>Unigene0083695</i> | 25                | 81              | PF00170.21 | 64            | 37.4         | CL0018 | bZIP transcription factor |
| <i>bZIP_18</i> | <i>Unigene0083709</i> | 411               | 457             | PF00170.21 | 64            | 44.2         | CL0018 | bZIP transcription factor |
| <i>bZIP_19</i> | <i>Unigene0095470</i> | 260               | 330             | PF00170.21 | 64            | 32.3         | CL0018 | bZIP transcription factor |
| <i>bZIP_20</i> | <i>Unigene0095601</i> | 1                 | 38              | PF00170.21 | 64            | 29.9         | CL0018 | bZIP transcription factor |

Note: envelope start: HMM model predicted structural domain start position of Unigene coding protein sequence, envelope end: HMM model predicted structural domain end position of Unigene coding protein sequence, hmm acc: Unigene encodes the number of the HMM corresponding to the structure of the protein sequence in Pfam, hmm length: length of matching sequence in the database, bit score: score of Unigene coding protein sequence structure compared to HMM model, clan: classification of Unigene coding protein sequence by protein sequence, structure and HMM file in the Pfam database, PfamA\_definition: the name of the structure corresponding to the query sequence in PfamA.

Supplementary Table S4. Analysis of bZIP genes enriched in GO and KEGG pathway

| ID            | Description                    | KEGG_A_class                         | KEGG_B_class        | Pathway | GO Component                             | GO Function                                                                                    | GO Process                                                                                                                                                                                         | Log <sub>2</sub> fold change |                       |
|---------------|--------------------------------|--------------------------------------|---------------------|---------|------------------------------------------|------------------------------------------------------------------------------------------------|----------------------------------------------------------------------------------------------------------------------------------------------------------------------------------------------------|------------------------------|-----------------------|
|               |                                |                                      |                     |         |                                          |                                                                                                |                                                                                                                                                                                                    | N-48 h vs. N+K-48 h          | N-168 h vs. N+K-168 h |
| <i>bZIP_1</i> | bZIP transcription factor      | -                                    | -                   | -       | intracellular membrane-bounded organelle | nucleic acid binding transcription factor activity; DNA binding; protein dimerization activity | regulation of transcription, DNA-templated; protein targeting; seed maturation; cellular response to stress                                                                                        | 0.94                         | 0.29                  |
| <i>bZIP_2</i> | bZIP transcription factor      | Environmental Information Processing | Signal transduction | ko04075 | intracellular membrane-bounded organelle | nucleic acid binding transcription factor activity; DNA binding                                | signal transduction; gene expression; cellular macromolecule biosynthetic process; response to chemical; floral organ formation; regulation of post-embryonic development                          | -9.55                        | 0.00                  |
| <i>bZIP_3</i> | bZIP transcription factor      | -                                    | -                   | -       | intracellular membrane-bounded organelle | nucleic acid binding transcription factor activity; DNA binding; protein dimerization activity | regulation of transcription, DNA-templated; protein targeting; seed maturation; cellular response to stress                                                                                        | 1.22                         | -0.22                 |
| <i>bZIP_4</i> | bZIP transcription factor 11   | -                                    | -                   | -       | -                                        | -                                                                                              | regulation of gene expression; regulation of cellular process                                                                                                                                      | -0.71                        | 0.43                  |
| <i>bZIP_5</i> | bZIP5                          | -                                    | -                   | -       | -                                        | DNA binding                                                                                    | signal transduction; response to chemical                                                                                                                                                          | 0.40                         | 1.01                  |
| <i>bZIP_6</i> | bZIP transcription factor ABF8 | Environmental Information Processing | Signal transduction | ko04075 | intracellular membrane-bounded organelle | DNA binding                                                                                    | response to acid chemical; regulation of transcription, DNA-templated; signal transduction; response to hormone; positive regulation of biological process; cellular response to organic substance | 0.27                         | 0.34                  |

| <i>bZIP_7</i>  | Predicted:<br>bZIP<br>transcription<br>factor 11          | - | - | - | -                                                              | DNA binding; protein<br>dimerization activity                                                              | regulation of gene expression;<br>regulation of cellular process                                                                                                                                                                                                                                                                                                                                                                       | -1.34 | 0.24  |  |
|----------------|-----------------------------------------------------------|---|---|---|----------------------------------------------------------------|------------------------------------------------------------------------------------------------------------|----------------------------------------------------------------------------------------------------------------------------------------------------------------------------------------------------------------------------------------------------------------------------------------------------------------------------------------------------------------------------------------------------------------------------------------|-------|-------|--|
| <i>bZIP_8</i>  | Predicted:<br>bZIP<br>transcription<br>factor 11          | - | - | - | intracellular membrane-<br>bounded organelle                   | nucleic acid binding<br>transcription factor<br>activity; protein<br>dimerization activity                 | signal transduction; negative<br>regulation of translation in<br>response to stress; response to<br>disaccharide                                                                                                                                                                                                                                                                                                                       | -2.60 | -1.79 |  |
| <i>bZIP_9</i>  | bZIP<br>transcription<br>factor 17-<br>like               | - | - | - | photosystem; plastid<br>stroma; plastid thylakoid<br>lumen     | -                                                                                                          | regulation of transcription, DNA-<br>templated; hyperosmotic<br>response; plastid membrane<br>organization; organ<br>morphogenesis; response to<br>chemical; cellular developmental<br>process                                                                                                                                                                                                                                         | 0.31  | -0.52 |  |
| <i>bZIP_10</i> | bZIP8                                                     | - | - | - | -                                                              | -                                                                                                          | -                                                                                                                                                                                                                                                                                                                                                                                                                                      | -0.61 | -0.12 |  |
| <i>bZIP_11</i> | bZIP11                                                    | - | - | - | intracellular membrane-<br>bounded organelle                   | nucleic acid binding<br>transcription factor<br>activity; DNA binding;<br>protein dimerization<br>activity | regulation of gene expression                                                                                                                                                                                                                                                                                                                                                                                                          | -0.81 | 5.22  |  |
| <i>bZIP_12</i> | bZIP12                                                    | - | - | - | intracellular membrane-<br>bounded organelle;<br>membrane part | DNA binding                                                                                                | immune system process; defense<br>response; response to<br>temperature stimulus; hormone-<br>mediated signaling pathway;<br>gene expression; cellular response<br>to stress; cellular macromolecule<br>biosynthetic process; intracellular<br>signal transduction; regulation of<br>programmed cell death; response<br>to other organism; cellular<br>response to acid chemical; cellular<br>response to oxygen-containing<br>compound | 1.27  | -0.01 |  |
| <i>bZIP_13</i> | bZIP<br>transcription<br>factor 17-<br>like isoform<br>X1 | - | - | - | -                                                              | -                                                                                                          | -                                                                                                                                                                                                                                                                                                                                                                                                                                      | 0.00  | 0.06  |  |

|                |                                                      |                                            |                        |         |                                              |                                                                                                            |                                                                                                                                                                                                                                                                                                                                                                                |       |       |
|----------------|------------------------------------------------------|--------------------------------------------|------------------------|---------|----------------------------------------------|------------------------------------------------------------------------------------------------------------|--------------------------------------------------------------------------------------------------------------------------------------------------------------------------------------------------------------------------------------------------------------------------------------------------------------------------------------------------------------------------------|-------|-------|
| <i>bZIP_14</i> | bZIP<br>transcription<br>factor 16<br>isoform X3     | -                                          | -                      | -       | intracellular membrane-<br>bounded organelle | nucleic acid binding<br>transcription factor<br>activity; DNA binding                                      | regulation of gene expression;<br>cellular macromolecule<br>biosynthetic process                                                                                                                                                                                                                                                                                               | 0.18  | 0.60  |
| <i>bZIP_15</i> | bZIP8                                                | -                                          | -                      | -       | -                                            | -                                                                                                          | -                                                                                                                                                                                                                                                                                                                                                                              | 0.49  | -0.73 |
| <i>bZIP_16</i> | bZIP<br>transcription<br>factor<br>TRAB1-like        | Environmental<br>Information<br>Processing | Signal<br>transduction | ko04075 | -                                            | DNA binding                                                                                                | response to acid chemical;<br>regulation of transcription, DNA-<br>templated; response to osmotic<br>stress; hormone-mediated<br>signaling pathway                                                                                                                                                                                                                             | 0.96  | 0.79  |
| <i>bZIP_17</i> | bZIP<br>transcription<br>factor 44-<br>like          | -                                          | -                      | -       | intracellular membrane-<br>bounded organelle | nucleic acid binding<br>transcription factor<br>activity; DNA binding;<br>protein dimerization<br>activity | signal transduction; negative<br>regulation of translation in<br>response to stress; response to<br>disaccharide                                                                                                                                                                                                                                                               | 0.12  | 1.59  |
| <i>bZIP_18</i> | bZIP14                                               | Environmental<br>Information<br>Processing | Signal<br>transduction | ko04075 | -                                            | nucleic acid binding                                                                                       | response to acid chemical;<br>developmental process involved<br>in reproduction; transcription,<br>DNA-templated; response to<br>stress; signal transduction;<br>response to abiotic stimulus;<br>response to hormone; post-<br>embryonic development; system<br>development; cellular response to<br>organic substance; cellular<br>response to oxygen-containing<br>compound | 2.06  | 0.42  |
| <i>bZIP_19</i> | BZIP-type<br>transcription<br>factor<br>MBZ1-like    | -                                          | -                      | -       | -                                            | -                                                                                                          | -                                                                                                                                                                                                                                                                                                                                                                              | -1.52 | -3.29 |
| <i>bZIP_20</i> | BZIP<br>domain-<br>containing<br>protein,<br>partial | -                                          | -                      | -       | -                                            | -                                                                                                          | -                                                                                                                                                                                                                                                                                                                                                                              | -0.96 | 0.00  |

Note: N-48 h: 200 mM NaCl-48 h, N + K-48 h: 200 mM NaCl + 10 mM KCl-48 h, N-168 h: 200 mM NaCl-168 h, N + K-168 h: 200 mM NaCl + 10 mM KCl-168 h; ko04075: Plant hormone signal transduction.

Supplementary Table S5. Analysis of Plant hormone signal transduction pathway

| Pathway                                   | Gene numbers | Class                                | <i>p</i> -Value | Up | Down |
|-------------------------------------------|--------------|--------------------------------------|-----------------|----|------|
| N-48 h vs. N + K-48 h                     |              |                                      |                 |    |      |
| Plant hormone signal transduction pathway | 74           | Environmental Information Processing | 0.000079        | 40 | 34   |
| N-168 h vs. N + K-168 h                   |              |                                      |                 |    |      |
| Plant hormone signal transduction pathway | 70           | Environmental Information Processing | 0.186311        | 40 | 30   |

Note: N-48 h: 200 mM NaCl-48 h, N + K-48 h: 200 mM NaCl + 10 mM KCl-48 h, N-168 h: 200 mM NaCl-168 h, N + K-168 h: 200 mM NaCl + 10 mM KCl-168 h.

Supplementary Table S6. Information sheet for the 10 homologous gene species

| Number         | Family        | Species                           | Description                                  | Protein ID     | CDS (bp) | ORF length (aa) |
|----------------|---------------|-----------------------------------|----------------------------------------------|----------------|----------|-----------------|
| <b>bZIP_6</b>  |               |                                   |                                              |                |          |                 |
| 1              | Tamaricaceae  | <i>Tamarix hispida</i>            | bZIP transcription factor ABF8               | AFS64078.1     | 756      | 251             |
| 2              | Ebenaceae     | <i>Diospyros kaki</i>             | transcription factor bZIP5                   | AZL19363.1     | 753      | 250             |
| 3              | Salicaceae    | <i>Populus trichocarpa</i>        | bZIP transcription factor TRAB1 isoform X1   | XP_024463868.1 | 831      | 276             |
| 4              | Malvaceae     | <i>Herrania umbratica</i>         | bZIP transcription factor 23-like isoform X2 | XP_021279402.1 | 816      | 271             |
| 5              | Rosaceae      | <i>Prunus persica</i>             | bZIP protein 5                               | ALO81024.1     | 813      | 270             |
| 6              | Salicaceae    | <i>Salix koriyanagi</i>           | bZIP transcription factor, partial           | KAJ6671864.1   | 717      | 238             |
| 7              | Cannabaceae   | <i>Trema orientale</i>            | bZIP transcription factor                    | POO01483.1     | 798      | 265             |
| 8              | Fabaceae      | <i>Sesbania bispinosa</i>         | bZIP domain                                  | KAJ1381125.1   | 735      | 244             |
| 9              | Cephalotaceae | <i>Cephalotus follicularis</i>    | bZIP_1 domain-containing protein             | GAV71580.1     | 1080     | 359             |
| 10             | Fabaceae      | <i>Lupinus albus</i>              | putative transcription factor bZIP family    | KAE9614903.1   | 810      | 269             |
| <b>bZIP_16</b> |               |                                   |                                              |                |          |                 |
| 1              | Theaceae      | <i>Camellia sinensis</i>          | bZIP transcription factor bZIP8              | AGG39700.1     | 1311     | 436             |
| 2              | Amaranthaceae | <i>Chenopodium quinoa</i>         | bZIP transcription factor 23-like            | XP_021720397.1 | 1479     | 492             |
| 3              | Vitaceae      | <i>Vitis vinifera</i>             | bZIP transcription factor 45                 | WIV69051.1     | 1344     | 447             |
| 4              | Polygonaceae  | <i>Fagopyrum tataricum</i>        | bZIP83                                       | QLL22062.1     | 1344     | 447             |
| 5              | Amaranthaceae | <i>Amaranthus tricolor</i>        | bZIP transcription factor TRAB1-like         | XP_057548279.1 | 1401     | 466             |
| 6              | Amaranthaceae | <i>Spinacia oleracea</i>          | bZIP transcription factor TRAB1              | XP_021847492.2 | 1452     | 483             |
| 7              | Lamiaceae     | <i>Salvia miltiorrhiza</i>        | bZIP2                                        | QWQ58702.1     | 1386     | 461             |
| 8              | Solanaceae    | <i>Nicotiana tomentosiformis</i>  | bZIP transcription factor 46-like            | XP_009598935.1 | 1329     | 442             |
| 9              | Bignoniaceae  | <i>Handroanthus impetiginosus</i> | bZIP transcription factor MafK               | PIN25269.1     | 1407     | 468             |
| 10             | Salicaceae    | <i>Populus alba</i>               | bZIP transcription factor 46-like            | XP_034932357.1 | 1362     | 453             |

Note: CDS means coding sequence, ORF means open reading frame.



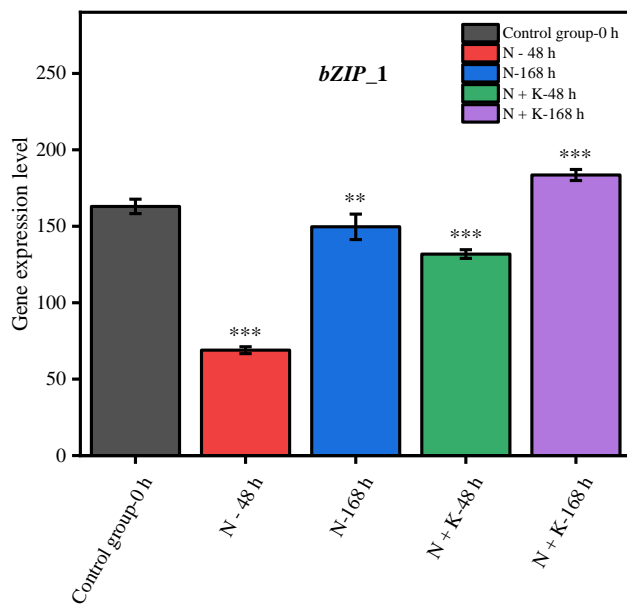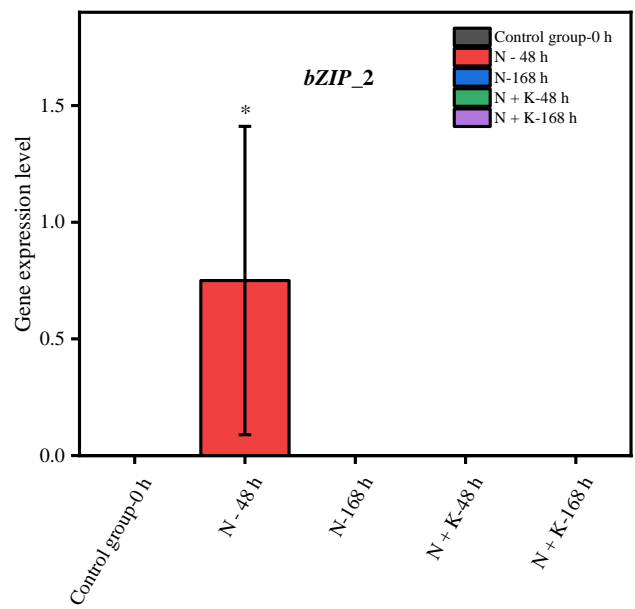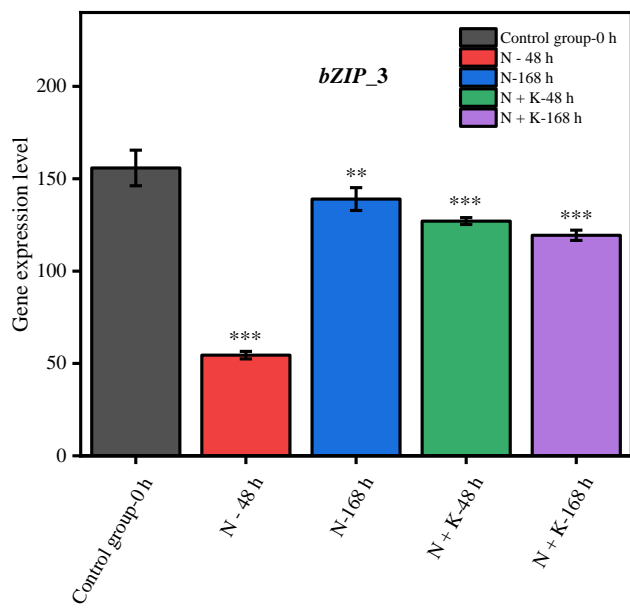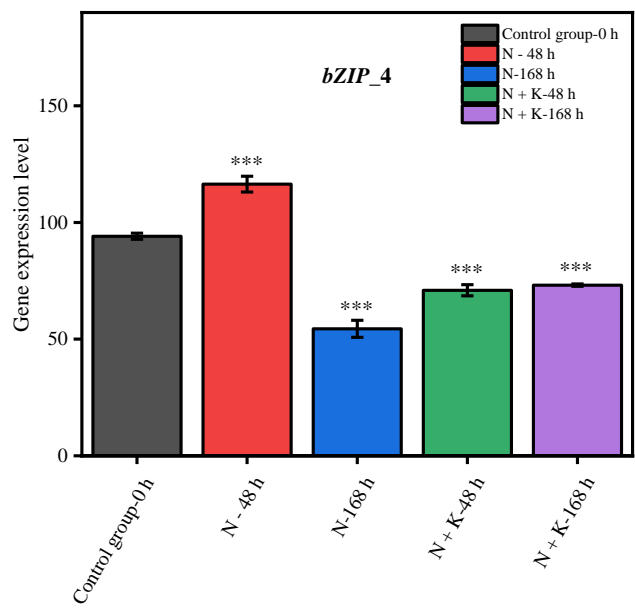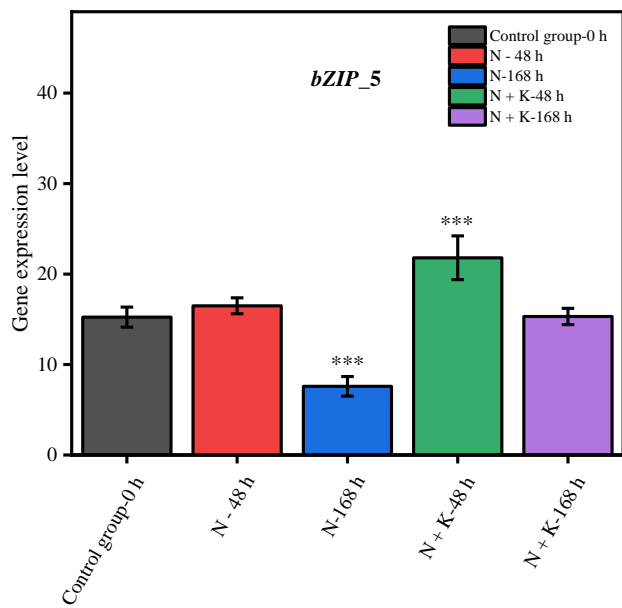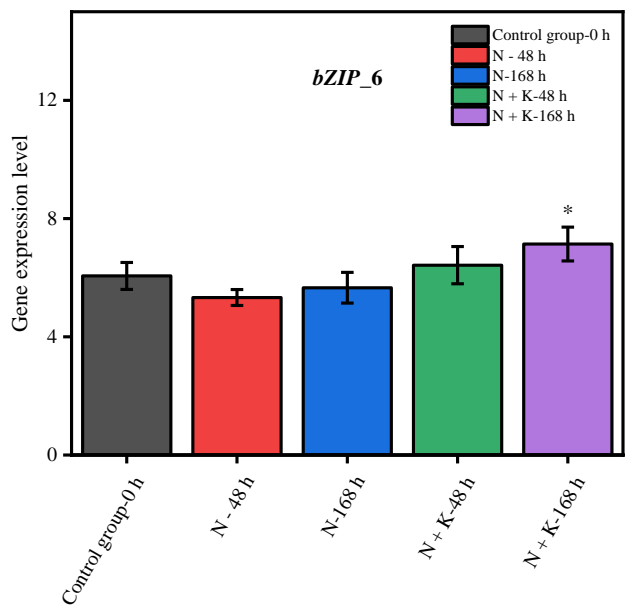

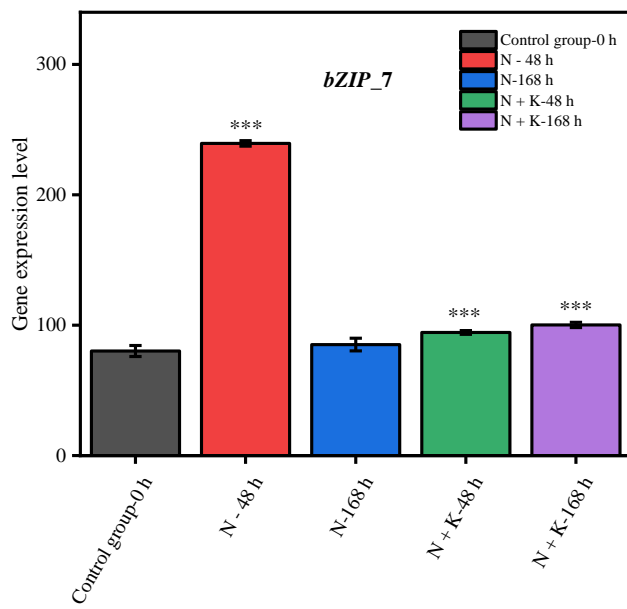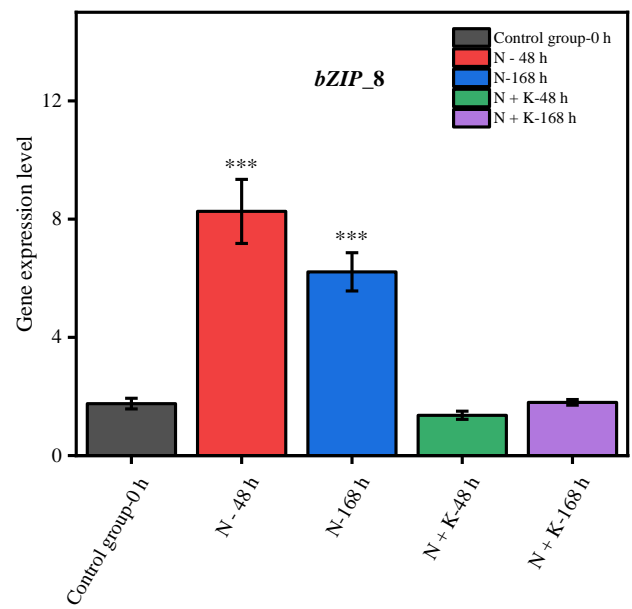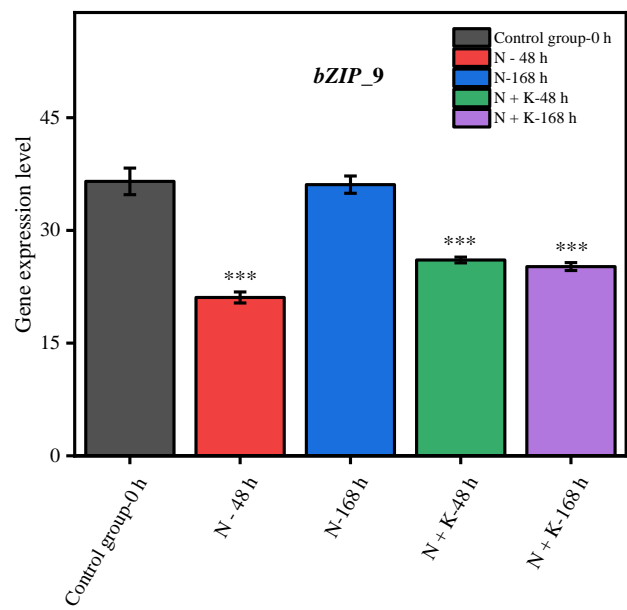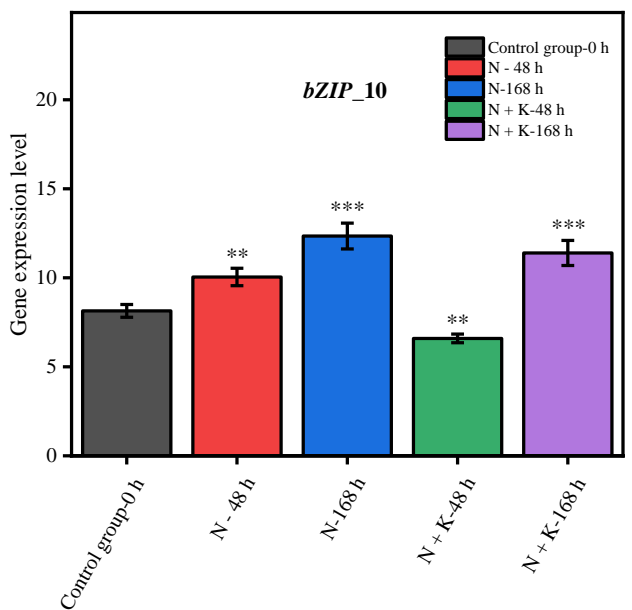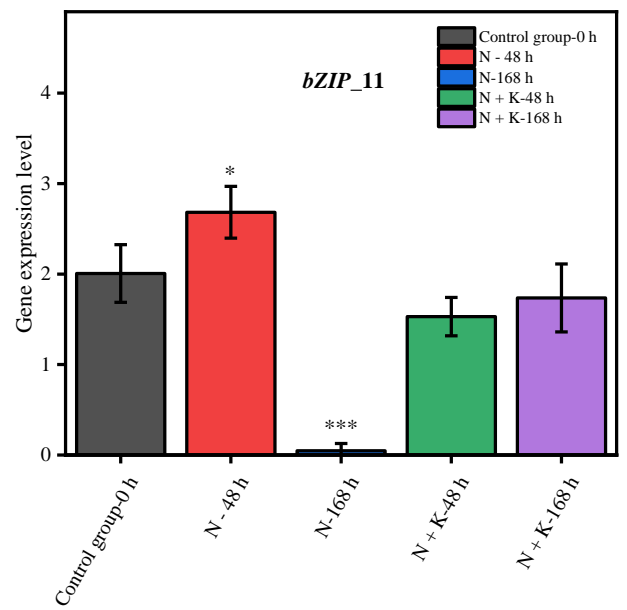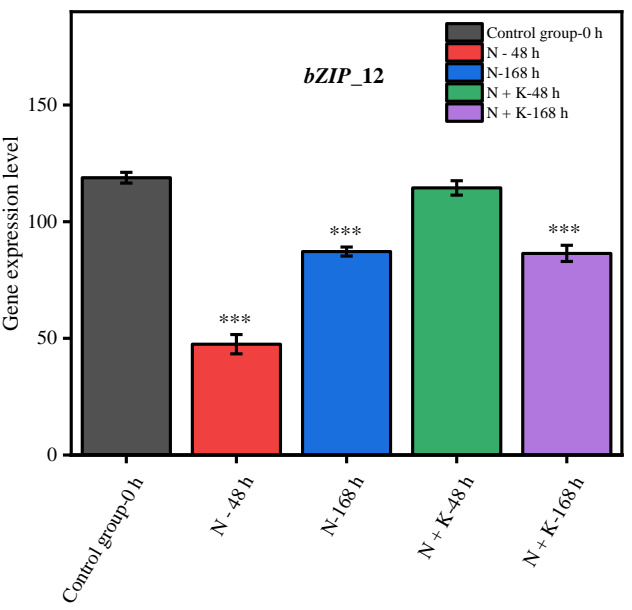

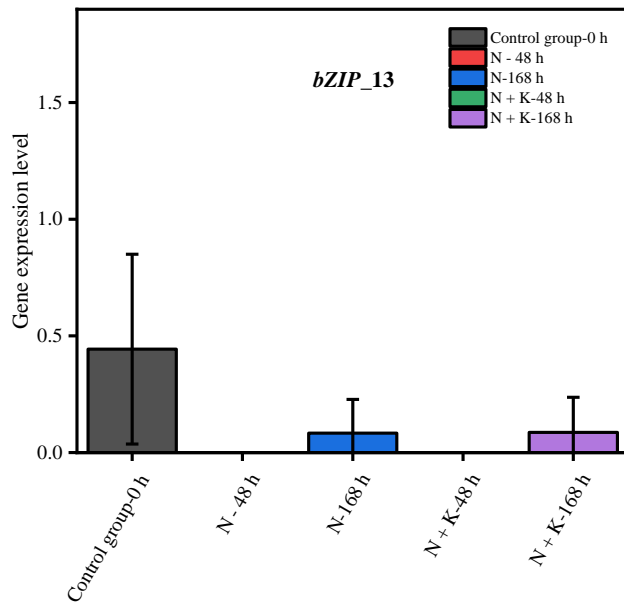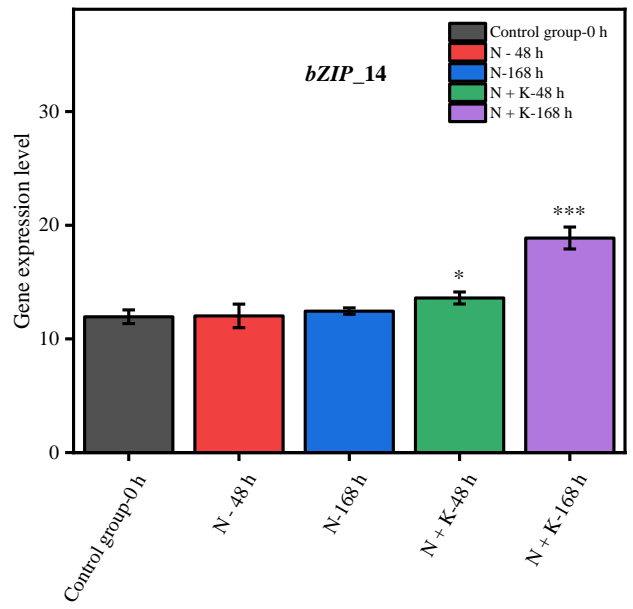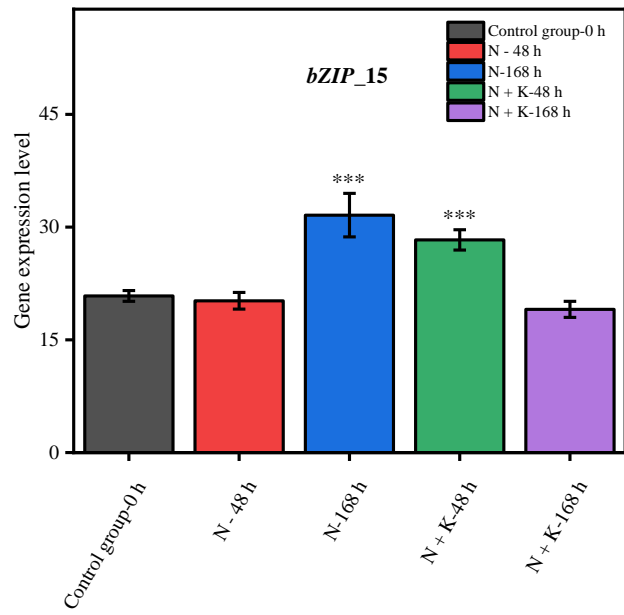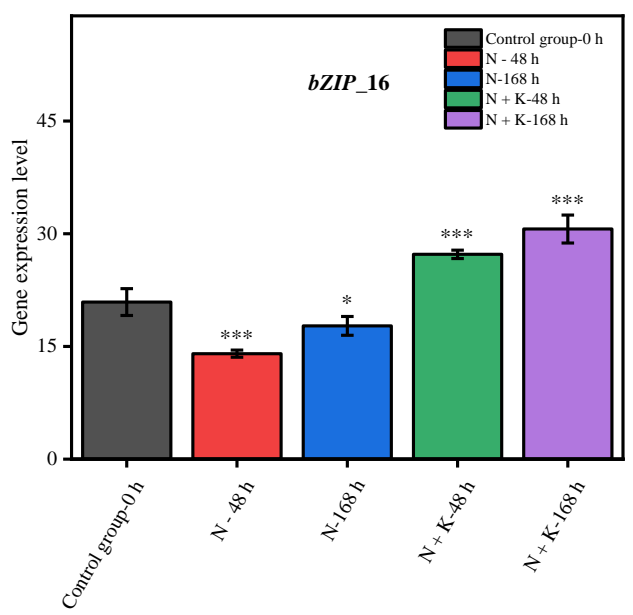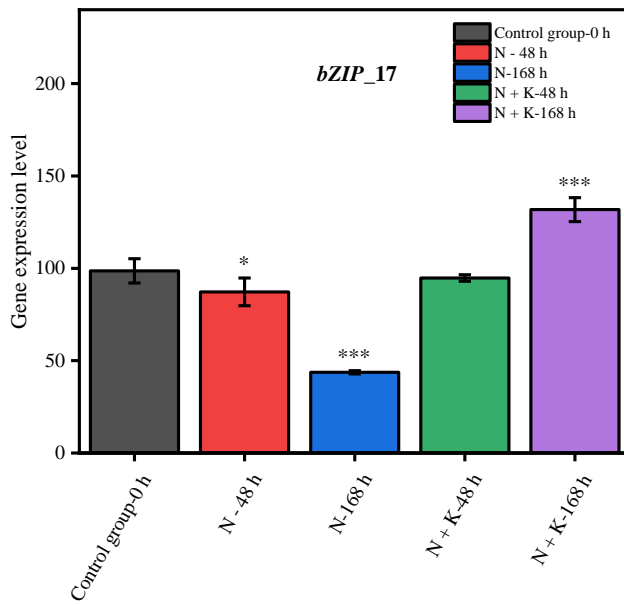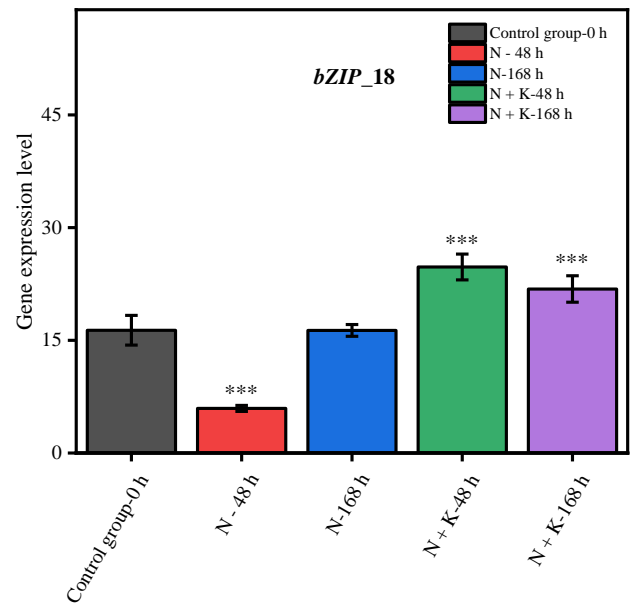

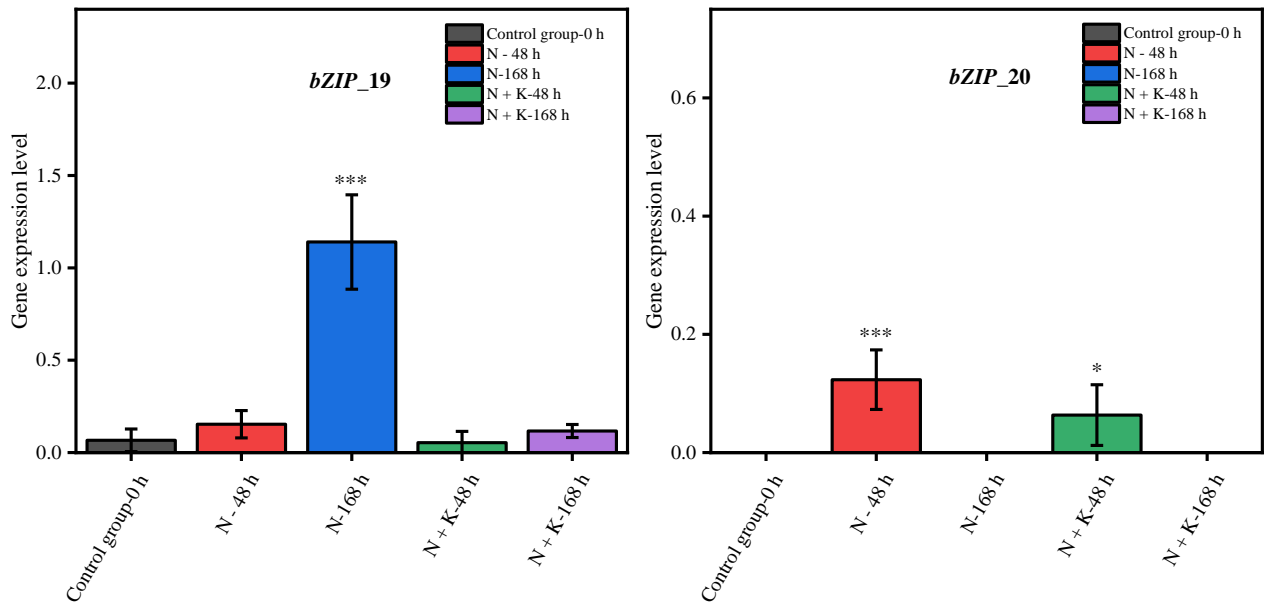

Supplementary Figure S1: Changes in the expression level of *bZIP* genes

(Changes in the expression levels of 20 *bZIP* genes in the roots of *T. ramosissima* under NaCl stress with exogenous K<sup>+</sup> applied for 48h and 168h. Note:  $p \geq 0.05$  is not marked;  $0.01 < p < 0.05$  is marked as \*;  $0.001 < p < 0.01$  is marked as \*\*;  $p \leq 0.001$  is marked as \*\*\*).
